# Supplementary material
Source: PubMed Central journal article supplement (PMC4059417)
Supplement: NIHMS593098-supplement-supplementary.pdf [file NIHMS593098-supplement-supplementary.pdf]

Supp. Fig.1

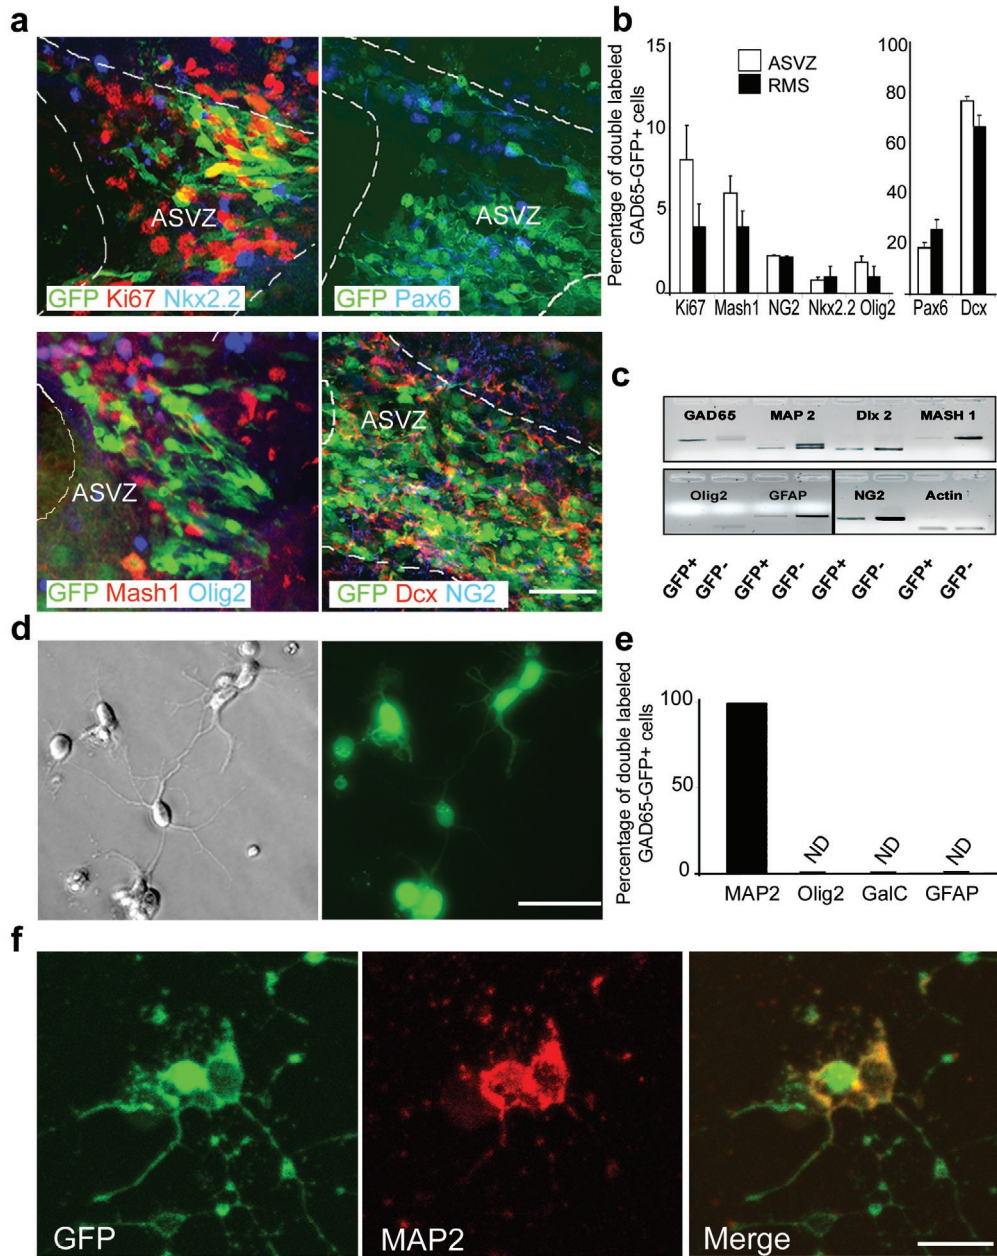

**Supplementary Figure 1. Neuronal and glial markers expressed in SVZ GAD65-GFP<sup>+</sup> cells of adult GAD65-GFP mice.** (a) Merged confocal images of the anterior subventricular zone (ASVZ) show GAD65-GFP<sup>+</sup> cells co-labeled with antibodies against Ki67, Mash1, NG2, Nkx2.2, Olig2, Pax6, and Dcx. Dotted lines bound the ASVZ. Scale bar = 500  $\mu$ m. (b) The majority of ASVZ GAD65-GFP<sup>+</sup> cells expressed neuronal markers (Pax6, Dcx). Bar graphs represent mean  $\pm$  s.e.m. (n = 4 brains per marker). (c) RT-PCR from FACS-purified GAD65-GFP<sup>+</sup> and GAD65-GFP<sup>-</sup> cells from ASVZ shows GAD65-GFP<sup>+</sup> cells expressing neuronal and oligodendrocytic genes. (d) Images of cultured (5 days) FACS-sorted GAD65-GFP<sup>+</sup> cells from ASVZ in bright field (left) and fluorescence (right) microscopy show neuronal morphology of GAD65-GFP<sup>+</sup> cells. Scale bar = 50  $\mu$ m. (e) Percentages of different cell types in FACS-purified SVZ GAD65-GFP<sup>+</sup> cells cultured for 5 days. All GAD65-GFP<sup>+</sup> cells displayed a neuronal phenotype, as demonstrated by MAP2 immunoreactivity; no Olig2, GalC or GFAP expression was detected (data from 2 independent experiments). ND = not detectable. (f) GAD65-GFP<sup>+</sup> cells FACS-purified from the adult SVZ and cultured for 5 days were immunostained with anti-MAP2 (red). Scale bar = 20  $\mu$ m.

Supp. Fig. 2

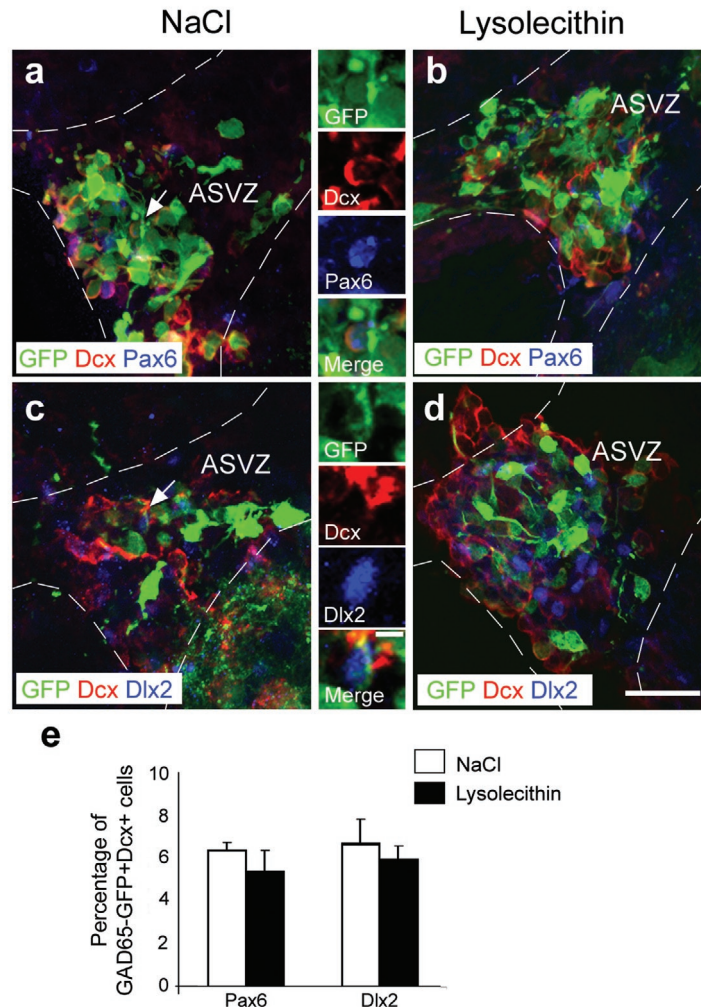

**Supplementary Figure 2. Characterization of GAD65-GFP<sup>+</sup> neuroblasts in the SVZ.** (a–d) Tri-colored images (5dpl) of GAD65-GFP<sup>+</sup> cells expressing Dcx (in red) together with Pax6 or Dlx2 (in blue) after NaCl (a,c) and LPC injections (b,d) into the corpus callosum. (e) Percentages of GAD65-GFP<sup>+</sup>Dcx<sup>+</sup> cells co-expressing Pax6 and Dlx2 at 5 dpl. No differences were found in percentages of GAD65-GFP<sup>+</sup>Dcx<sup>+</sup> neuroblasts that express Pax6 and Dlx2 in demyelinated corpus callosum, compared to NaCl-injected brains. Bar graphs represent mean  $\pm$  s.e.m. (n = 4 brains,  $P < 0.5$ , *t*-test).

Supp. Fig. 3

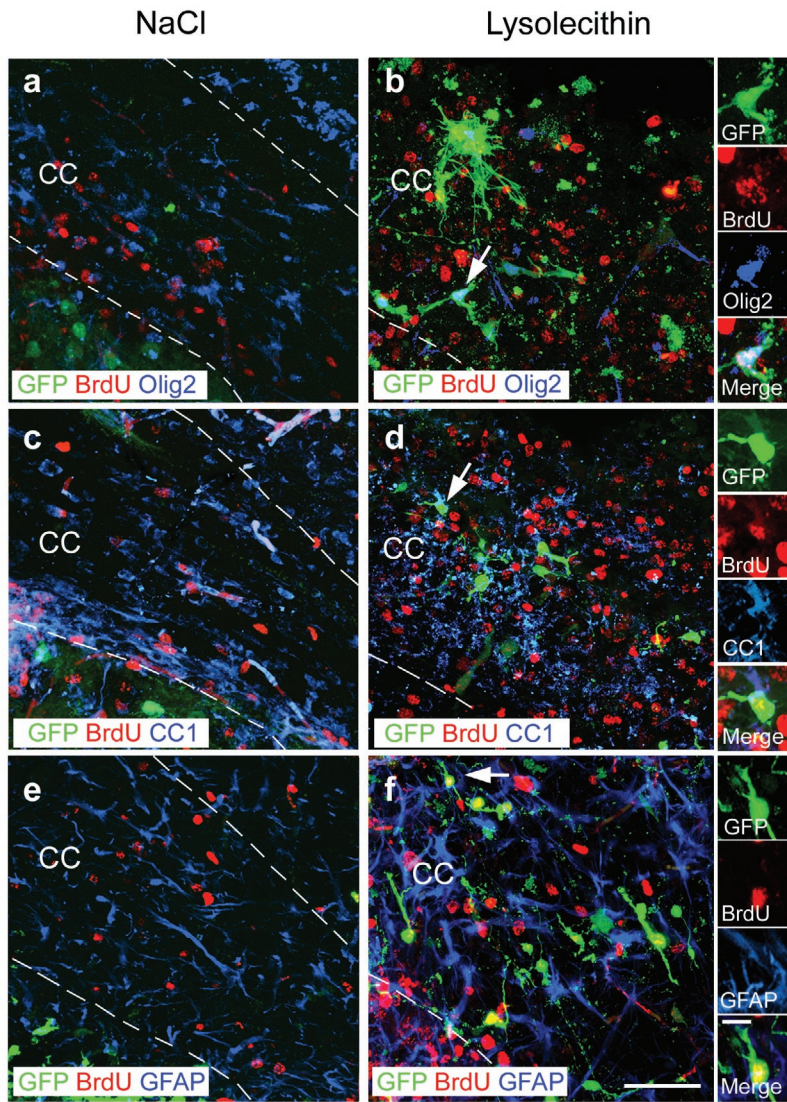

**Supplementary Figure 3. GAD65-GFP<sup>+</sup> cell proliferation increases in corpus callosum after demyelination.** Tri-colored confocal images from NaCl- (**a,c,e**) and LPC-injected (**b,d,f**) corpus callosum (10 dpl) after intraperitoneal injection of BrdU (every 24 hrs for 5 consecutive days) and double immunostaining with antibodies against BrdU together with anti-Olig2 (**a,b**), anti-CC1 (**c,d**), or anti-GFAP (**e,f**) antibodies. Dotted lines bound corpus callosum. Cells pointed by arrows are magnified in insets. Scale bar = 50  $\mu$ m.

Supp. Fig.4

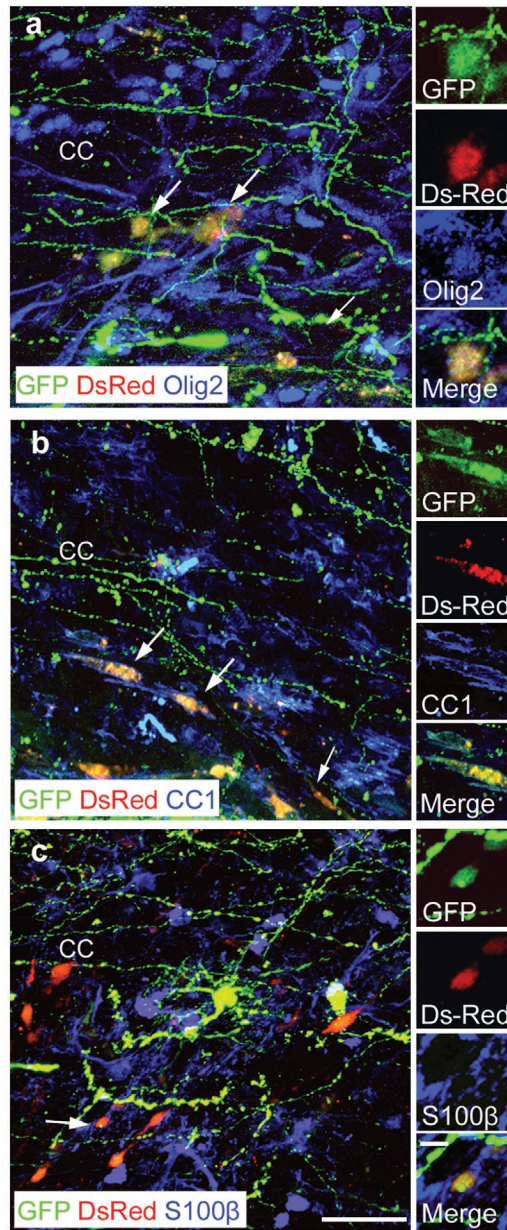

**Supplementary Figure 4. GAD65-GFP<sup>+</sup> cells found in demyelinated corpus callosum migrate from the SVZ.** Tri-colored images from LPC-injected corpus callosum (**a–c**). GAD65-GFP<sup>+</sup> cells were infected with dsRed virus and labeled with anti-Olig2 (**a**), anti-CC1 (**b**), or anti-S100 $\beta$  (**c**) antibodies at 14 dpl. Inserts show higher magnification of retrovirally labeled GAD65-GFP<sup>+</sup>dsRed<sup>+</sup> cells expressing Olig2, CC1, and S100 $\beta$  in demyelinated corpus callosum. Arrows point to GAD65-GFP<sup>+</sup>dsRed<sup>+</sup>Olig2<sup>+</sup>, GAD65-GFP<sup>+</sup>dsRed<sup>+</sup>CC1<sup>+</sup>, or GAD65-GFP<sup>+</sup>dsRed<sup>+</sup>S100 $\beta$ <sup>+</sup> cells in corpus callosum. Scale bar = 50  $\mu$ m.



Supp. Fig.5

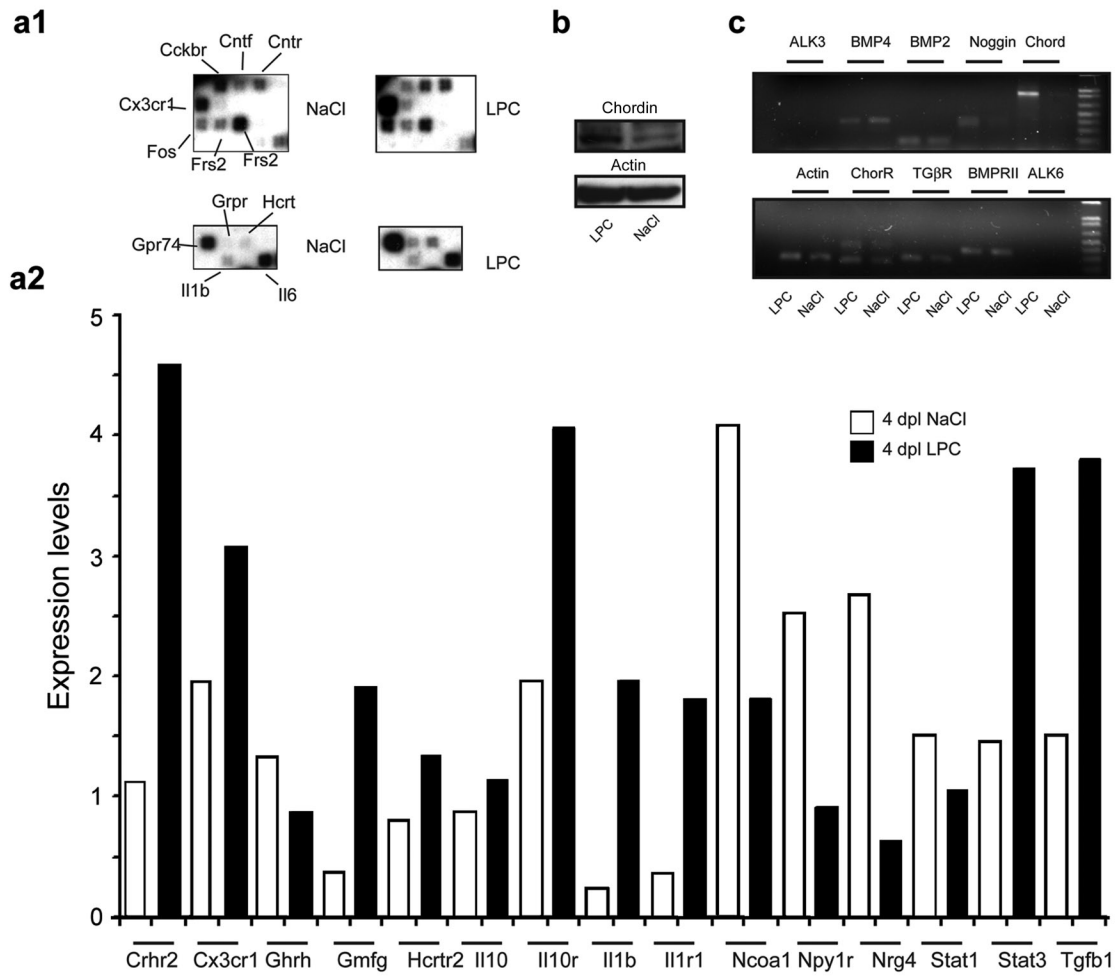

**Supplementary Figure 5. Microarray analysis of SVZ tissue from NaCl- and LPC-injected brains.** (a1, a2) Gene expression analysis shows upregulation of *Crhr2*, *Cx3cr1*, *Il10r*, *Stat3*, and *Tgfb1* after demyelination (4dpi). Corticotropin releasing hormone receptor 2 (*Crhr2*), Chemokine receptor 1 (*Cx3cr1*), Growth hormone releasing hormone (*Ghrh*), Glia maturation factor gamma (*Gmfg*), Hypocretin (orexin) receptor 2 (*Hcrtr2*), Interleukin 10 (*Il10*), Interleukin 10 receptor beta (*Il10r*), Interleukin 1 beta (*Il1b*), Interleukin 1 receptor, type I (*Il1r1*), Nuclear receptor coactivator 1 (*Ncoa1*), Neuropeptide Y receptor Y1 (*Npy1r*), Neuregulin 4 (*Nrg4*), Signal transducer and activator of transcription 1 (*STAT1*), Signal transducer and activator of transcription 3 (*STAT3*), Transforming growth factor beta 1 induced transcript 1 (*Tgfb1*). (b) Western blot analysis showed upregulation of chordin after demyelination (LPC), compared to NaCl-injected tissue (NaCl; representative samples - 4 independent corpus callosum samples were analyzed in each group). (c) RT-PCR revealed decreased *BMP4*, and higher expression of *chordin*, *noggin*, and *ChorR* in SVZ after LPC injection into corpus callosum (4 independent corpus callosum samples analyzed per group).

Supp. Fig.6

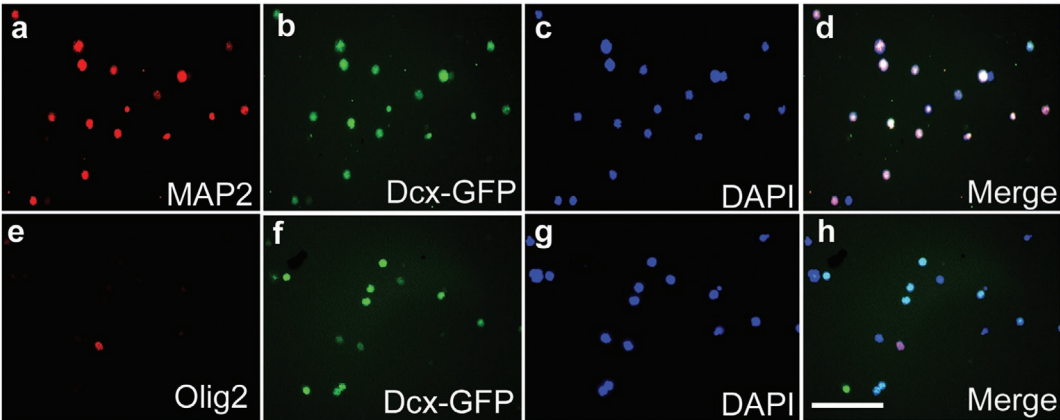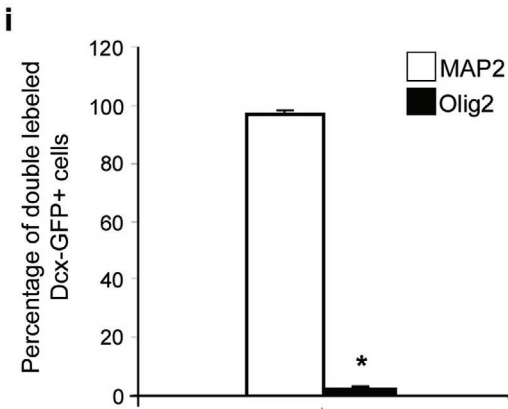

**Supplementary Figure 6. Culture homogeneity of Dcx-GFP cells.** Images of FACS-purified Dcx-GFP<sup>+</sup> cells immunostained with anti-MAP2 (**a–d**) and anti-Olig2 (**e–h**) antibodies at 24hr in culture. (**i**) Bar graph represents percentages of Dcx-GFP<sup>+</sup> cells expressing MAP2 and Olig2. The Dcx-GFP<sup>+</sup> cell population expresses the neuronal marker MAP2 (99.5%). Bar graph represents means  $\pm$  s.e.m. (n = 3 independent cultures, \*\*\* $P < 0.001$ , *t*-test)
